# Supplementary material
Source: PubMed Central journal article supplement (PMC3508383)
Supplement: NIHMS419028-supplement-1_si_001.pdf [file NIHMS419028-supplement-1_si_001.pdf]

*Supporting Information for*

**A Timesaving Strategy for MAS NMR Spectroscopy by  
Combining Non-Uniform Sampling and Paramagnetic Relaxation  
Assisted Condensed Data Collection**

*Shangjin Sun,<sup>1,2§</sup> Si Yan,<sup>1§</sup> Changmiao Guo,<sup>1</sup> Mingyue Li,<sup>1</sup> Jeffrey C. Hoch,<sup>3</sup> John C. Williams,<sup>4</sup>  
and Tatyana Polenova<sup>1</sup>.*

<sup>1</sup>Department of Chemistry and Biochemistry, University of Delaware, Newark, DE 19716, United States; <sup>2</sup>Current address: Structural Biophysics Laboratory, Center for Cancer Research, National Cancer Institute, Frederick, MD; <sup>3</sup>Department of Molecular, Microbial, and Structural Biology, University of Connecticut Health Center, 263 Farmington Avenue, Farmington, CT 06030-3305, United States; <sup>4</sup>Department of Molecular Medicine, Beckman Research Institute of City of Hope, 1500 East Duarte Road, Duarte, CA 91010, United States

---

To whom the correspondence should be addressed:

\*Tatyana Polenova, Department of Chemistry and Biochemistry, University of Delaware, Newark, DE 19716, e-mail: [tpolenov@udel.edu](mailto:tpolenov@udel.edu), Tel. (302) 831-1968, FAX (302) 831-6335.

§These authors contributed equally to this publication

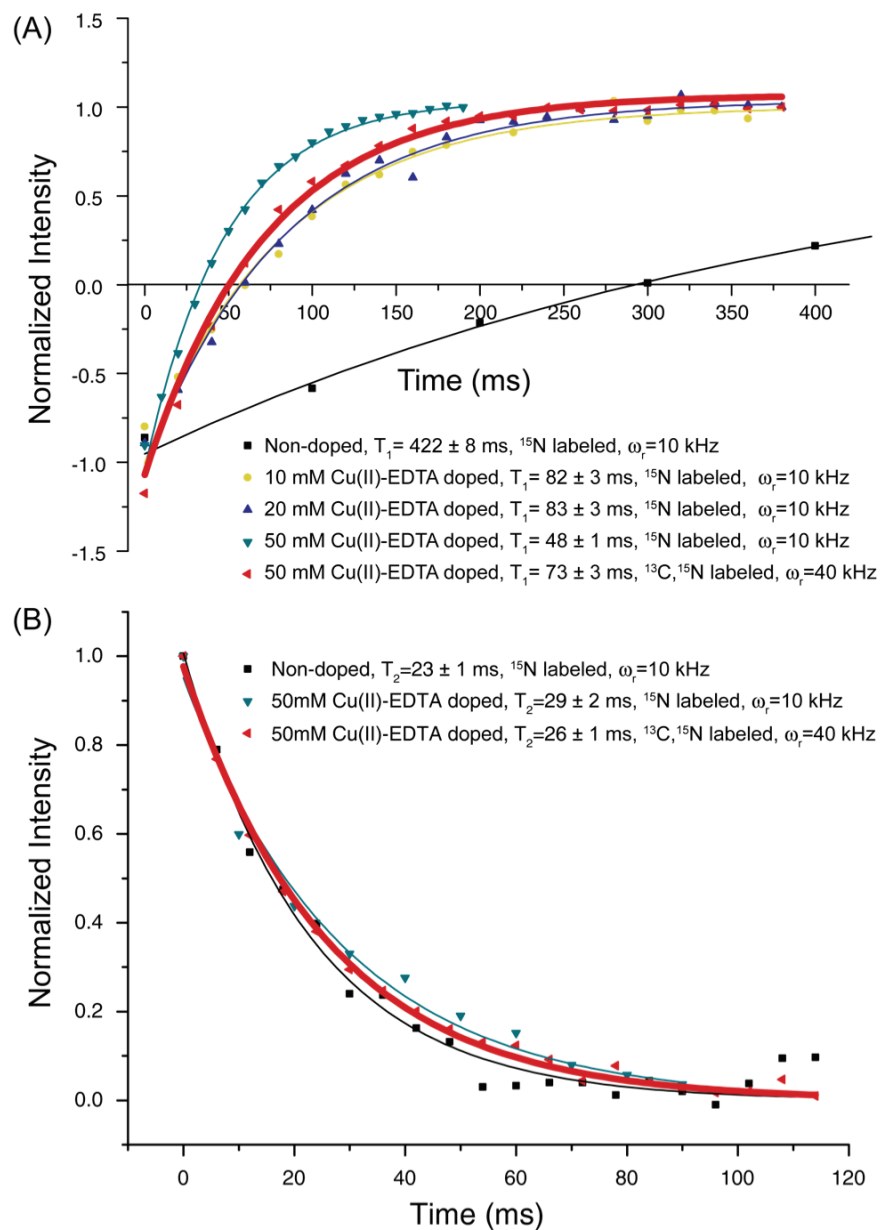

**Figure S1.** (A)  $^1\text{H}$   $T_1$  curves of U- $^{13}\text{C}$ ,  $^{15}\text{N}$ -labeled LC8 doped with 50 mM Cu(II)-EDTA (red trace, bold line), and of  $^{15}\text{N}$  labeled LC8, neat (“0 mM”) (black trace), and Cu(II)-EDTA doped at 10 mM (yellow), 20 mM (blue trace), and 50 mM (dark cyan trace). (B)  $^{15}\text{N}$   $T_2$  curves of U- $^{13}\text{C}$ ,  $^{15}\text{N}$ -labeled LC8 doped with 50 mM Cu(II)-EDTA (red trace, bold line), and of  $^{15}\text{N}$  labeled LC8, neat (“0 mM”) (black trace) and 50 mM (dark cyan trace). Experiments were carried out at the MAS frequency of 10 kHz for  $^{15}\text{N}$  labeled LC8 and 40 kHz for U- $^{13}\text{C}$ ,  $^{15}\text{N}$ -labeled LC8. Points represent normalized intensities for peaks displaying the largest magnitude in 1D spectra, and are fitted to the following equations:  $I = I_0 [1 - 2\exp(-t/T_1)]$  and  $I = I_0 \exp(-t/T_2)$  to extract  $^1\text{H}$   $T_1$  and  $^{15}\text{N}$   $T_2$ , respectively.

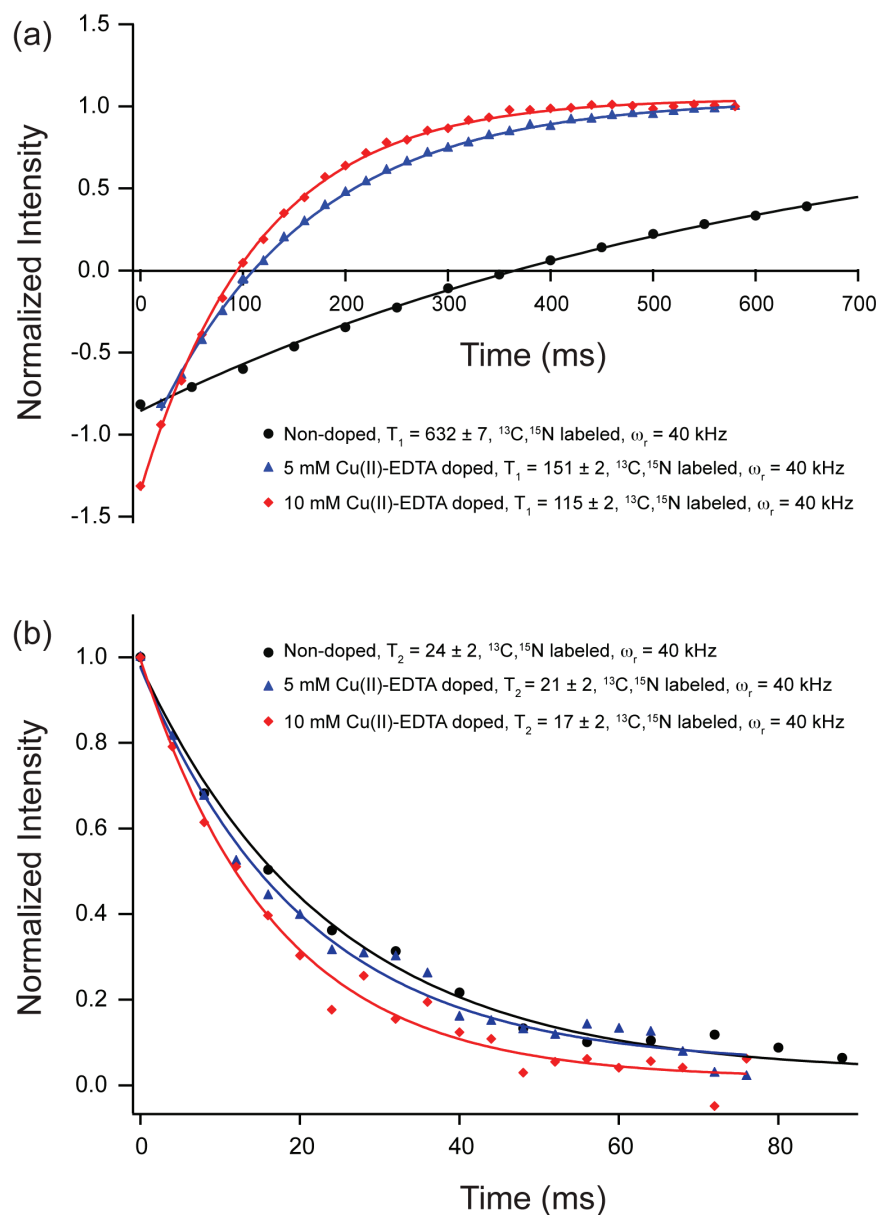

**Figure S2.** (A)  $^1\text{H}$   $T_1$  curves of U- $^{13}\text{C}$ ,  $^{15}\text{N}$ -labeled neat LC8 (black trace), and LC8 doped with Cu(II)-EDTA at 5 mM (blue) and 10 mM (red) (B)  $^{15}\text{N}$   $T_2$  curves of U- $^{13}\text{C}$ ,  $^{15}\text{N}$ -labeled neat LC8 (black trace), and LC8 doped with Cu(II)-EDTA at 5 mM (blue) and 10 mM (red). Experiments were carried out at the MAS frequency of 40 kHz. Points represent normalized intensities for peaks displaying the largest magnitude in 1D spectra, and are fitted to the following equations:  $I = I_0 [1 - 2\exp(-t/T_1)]$  and  $I = I_0 \exp(-t/T_2)$  to extract  $^1\text{H}$   $T_1$  and  $^{15}\text{N}$   $T_2$ , respectively.

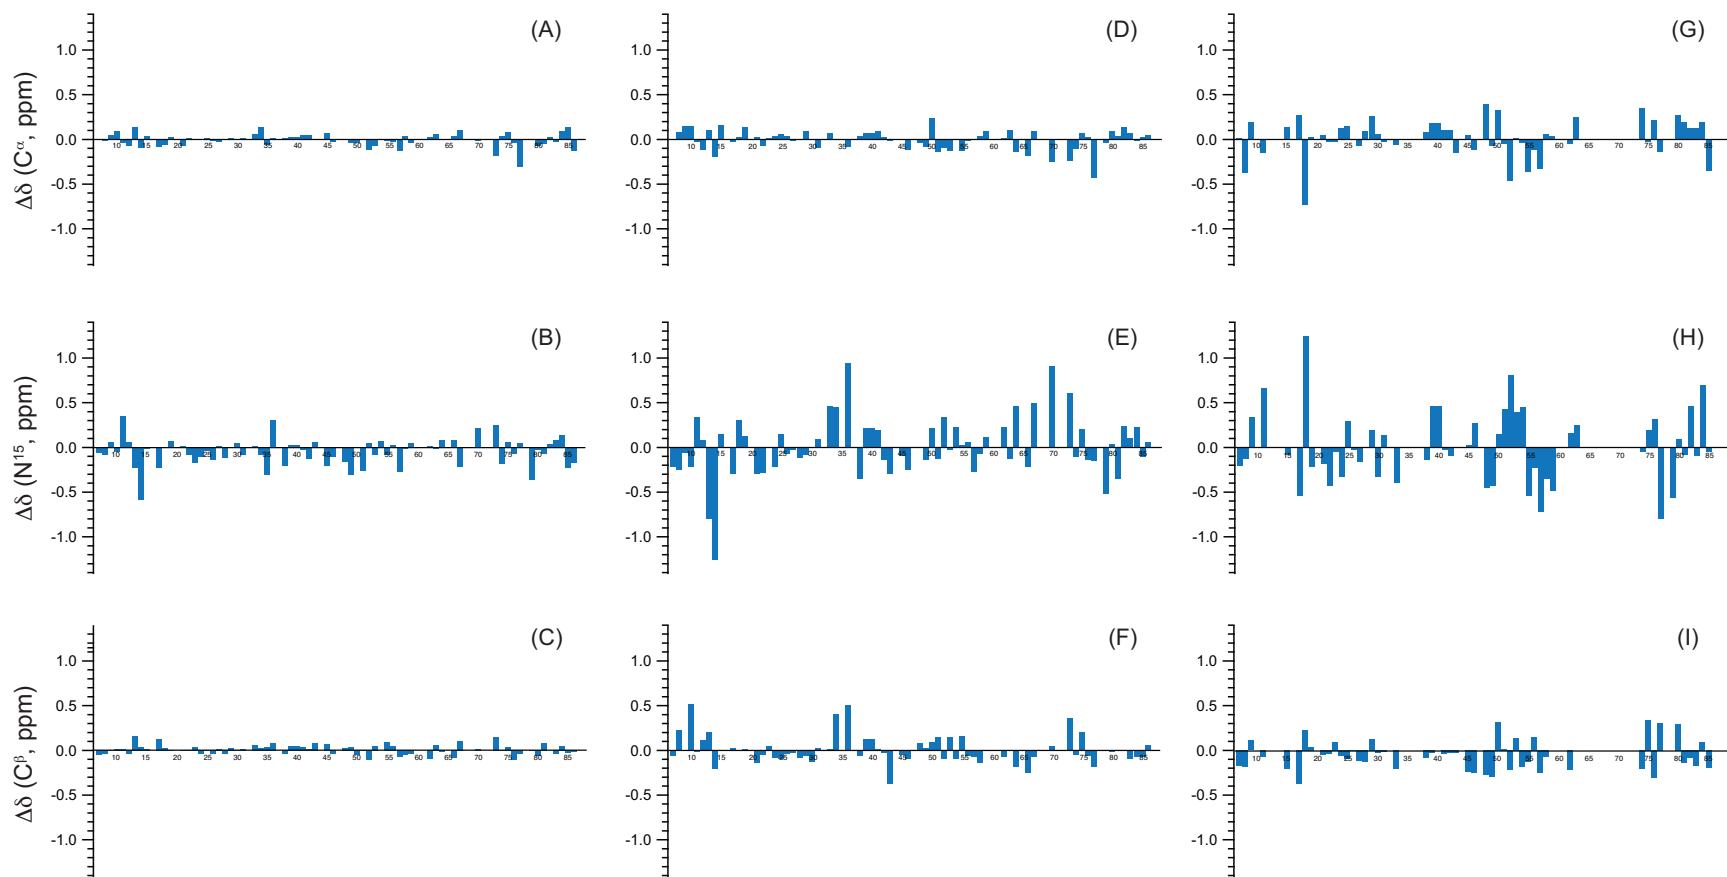

**Figure S3.** The chemical shift deviations between 3D NCACB spectrum of neat LC8 and 3D NCACB spectra of samples doped with different concentration of Cu(II)-EDTA: 5 mM (left column (A)-(C)), 10 mM (middle column (D)-(F)), 50 mM (right column (G)-(I)).

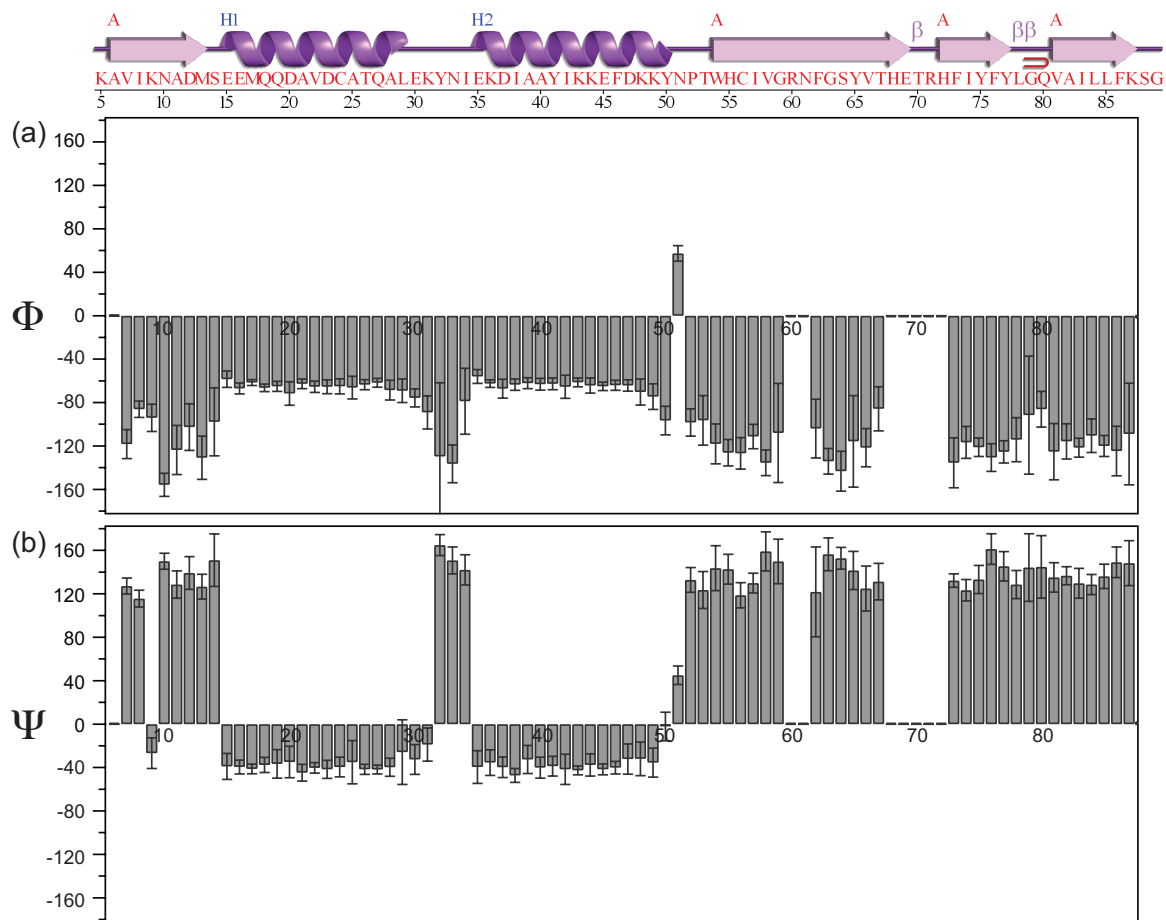

**Figure S4.** The torsion angles from the NUS-PACC assignments from 5 mM Cu(II)-EDTA LC8 predicted by TALOS+. The predicted secondary structures are highly consistent with X-ray structure and former solution/solid NMR results.

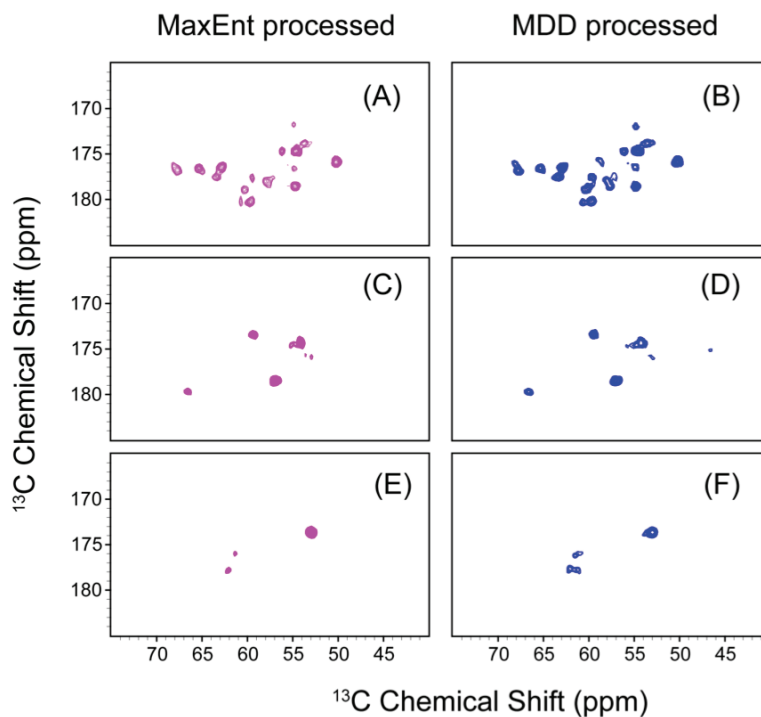

**Figure S5.** Representative 2D planes of NUS-PACC-NCOCA processed with MaxEnt and MDD. The spectra were acquired on a LC8 sample doped with 50 mM Cu(II)-EDTA. (A), (C), (E) are planes for MaxEnt-processed NUS-NCOCA-324 spectrum; (B), (D), (F) are planes for MDD-processed NUS-NCOCA spectrum. Comparison of (A), (C), (E) with (B), (D), (F) indicates that MaxEnt- and MDD- processed spectra are very similar. .

**Table S1.** Solution chemical shift perturbations observed in the  $^{15}\text{N}$ - $^1\text{H}$  HSQC spectra of LC8 prepared with different Cu(II)-EDTA dopant concentration

| Residue    | $\Delta\delta$ (ppm) of 0mM vs. 5mM Cu(II)-EDTA |               | $\Delta\delta$ (ppm) of 0mM vs. 10mM Cu(II)-EDTA |               | $\Delta\delta$ (ppm) of 0mM vs. 20mM Cu(II)-EDTA |               | $\Delta\delta$ (ppm) of 0mM vs. 50mM Cu(II)-EDTA |               |
|------------|-------------------------------------------------|---------------|--------------------------------------------------|---------------|--------------------------------------------------|---------------|--------------------------------------------------|---------------|
|            | N                                               | H             | N                                                | H             | N                                                | H             | N                                                | H             |
| M1         | 0.027                                           | 0.005         | 0.019                                            | 0.007         | 0.047                                            | 0.011         | 0.078                                            | 0.015         |
| S2         | 0.012                                           | 0.005         | -0.007                                           | 0.005         | -0.003                                           | 0.007         | 0.009                                            | 0.008         |
| D3         | 0.003                                           | 0.006         | -0.022                                           | 0.008         | -0.020                                           | 0.013         | -0.021                                           | 0.017         |
| R4         | 0.037                                           | 0.004         | 0.027                                            | 0.007         | 0.054                                            | 0.010         | 0.073                                            | 0.011         |
| K5         | 0.030                                           | 0.008         | 0.035                                            | 0.016         | 0.082                                            | 0.028         | 0.132                                            | 0.038         |
| A6         | 0.005                                           | 0.004         | -0.025                                           | 0.004         | -0.029                                           | 0.006         | -0.025                                           | 0.009         |
| V7         | 0.034                                           | 0.007         | 0.017                                            | 0.009         | 0.051                                            | 0.013         | 0.079                                            | 0.018         |
| I8         | 0.000                                           | 0.001         | -0.028                                           | -0.001        | -0.027                                           | -0.001        | -0.030                                           | -0.004        |
| K9         | 0.047                                           | 0.002         | 0.088                                            | 0.008         | 0.121                                            | 0.011         | 0.150                                            | 0.012         |
| N10        | -0.008                                          | 0.001         | -0.053                                           | 0.004         | -0.081                                           | 0.007         | -0.100                                           | 0.007         |
| A11        | 0.000                                           | 0.000         | 0.003                                            | -0.004        | -0.001                                           | 0.002         | 0.008                                            | 0.017         |
| <b>D12</b> | <b>-0.011</b>                                   | <b>0.002</b>  | <b>-0.009</b>                                    | <b>-0.001</b> | <b>ND*</b>                                       | <b>ND</b>     | <b>ND</b>                                        | <b>ND</b>     |
| <b>M13</b> | <b>-0.106</b>                                   | <b>-0.013</b> | <b>0.146</b>                                     | <b>-0.015</b> | <b>ND</b>                                        | <b>ND</b>     | <b>ND</b>                                        | <b>ND</b>     |
| <b>S14</b> | <b>-0.080</b>                                   | <b>-0.002</b> | <b>0.143</b>                                     | <b>-0.048</b> | <b>ND</b>                                        | <b>ND</b>     | <b>ND</b>                                        | <b>ND</b>     |
| E15        | -0.023                                          | -0.005        | -0.052                                           | -0.006        | -0.076                                           | -0.011        | -0.092                                           | -0.015        |
| E16        | -0.012                                          | -0.010        | -0.033                                           | -0.013        | -0.042                                           | -0.026        | -0.051                                           | -0.035        |
| M17        | -0.002                                          | -0.007        | -0.025                                           | -0.003        | -0.023                                           | -0.005        | -0.020                                           | -0.003        |
| Q18        | -0.025                                          | 0.003         | -0.049                                           | 0.003         | -0.075                                           | 0.002         | -0.078                                           | 0.004         |
| Q19        | 0.031                                           | 0.004         | -0.003                                           | 0.006         | -0.014                                           | 0.008         | -0.032                                           | 0.010         |
| D20        | 0.000                                           | 0.006         | -0.009                                           | 0.015         | -0.003                                           | 0.025         | -0.023                                           | -0.002        |
| A21        | 0.020                                           | -0.002        | 0.017                                            | -0.002        | 0.057                                            | -0.001        | 0.068                                            | 0.000         |
| V22        | -0.043                                          | -0.005        | -0.057                                           | -0.005        | -0.071                                           | -0.008        | -0.073                                           | -0.011        |
| D23        | 0.009                                           | 0.004         | -0.014                                           | 0.009         | -0.009                                           | 0.014         | -0.022                                           | 0.017         |
| C24        | -0.025                                          | 0.001         | -0.052                                           | 0.001         | -0.063                                           | 0.002         | -0.077                                           | 0.003         |
| A25        | -0.010                                          | -0.002        | -0.015                                           | -0.003        | -0.013                                           | -0.006        | -0.002                                           | -0.009        |
| T26        | -0.024                                          | 0.004         | -0.045                                           | 0.006         | -0.058                                           | 0.010         | -0.054                                           | 0.012         |
| Q27        | 0.015                                           | 0.004         | -0.027                                           | 0.010         | -0.007                                           | 0.015         | -0.008                                           | 0.020         |
| A28        | 0.024                                           | -0.002        | -0.015                                           | -0.002        | -0.017                                           | -0.001        | -0.017                                           | -0.003        |
| L29        | 0.016                                           | 0.006         | 0.015                                            | 0.011         | 0.022                                            | 0.017         | 0.045                                            | 0.021         |
| E30        | -0.003                                          | 0.000         | -0.032                                           | 0.005         | -0.039                                           | 0.008         | -0.030                                           | 0.012         |
| K31        | 0.018                                           | 0.004         | -0.001                                           | 0.007         | 0.002                                            | 0.010         | 0.023                                            | 0.013         |
| Y32        | 0.008                                           | -0.001        | -0.007                                           | 0.001         | -0.003                                           | 0.001         | 0.002                                            | 0.000         |
| N33        | 0.061                                           | 0.011         | 0.038                                            | 0.016         | 0.064                                            | 0.027         | 0.092                                            | 0.034         |
| I34        | 0.038                                           | 0.009         | 0.054                                            | 0.014         | 0.101                                            | 0.024         | 0.133                                            | 0.030         |
| <b>E35</b> | <b>-0.054</b>                                   | <b>-0.015</b> | <b>-0.113</b>                                    | <b>-0.025</b> | <b>-0.145</b>                                    | <b>-0.050</b> | <b>-0.223</b>                                    | <b>-0.072</b> |
| <b>K36</b> | <b>0.103</b>                                    | <b>0.007</b>  | <b>0.190</b>                                     | <b>0.015</b>  | <b>0.307</b>                                     | <b>0.026</b>  | <b>0.487</b>                                     | <b>0.029</b>  |
| D37        | -0.097                                          | -0.009        | -0.261                                           | -0.014        | -0.031                                           | -0.022        | -0.011                                           | 0.010         |
| <b>I38</b> | <b>-0.057</b>                                   | <b>-0.004</b> | <b>-0.118</b>                                    | <b>0.004</b>  | <b>-0.188</b>                                    | <b>0.003</b>  | <b>-0.237</b>                                    | <b>0.004</b>  |
| <b>A39</b> | <b>0.084</b>                                    | <b>0.009</b>  | <b>0.122</b>                                     | <b>0.012</b>  | <b>0.209</b>                                     | <b>0.023</b>  | <b>0.275</b>                                     | <b>0.026</b>  |
| A40        | 0.003                                           | -0.022        | -0.021                                           | -0.017        | -0.018                                           | -0.012        | -0.031                                           | -0.009        |
| Y41        | -0.037                                          | 0.003         | -0.056                                           | 0.007         | -0.083                                           | 0.010         | -0.080                                           | 0.016         |
| I42        | 0.035                                           | 0.002         | 0.014                                            | 0.009         | 0.018                                            | 0.013         | 0.070                                            | 0.020         |
| K43        | 0.012                                           | 0.007         | 0.031                                            | 0.015         | 0.055                                            | 0.027         | 0.095                                            | 0.033         |
| K44        | -0.050                                          | -0.004        | -0.115                                           | -0.005        | -0.154                                           | -0.005        | -0.208                                           | -0.002        |
| E45        | 0.002                                           | 0.005         | -0.031                                           | 0.007         | -0.052                                           | 0.013         | -0.056                                           | 0.022         |
| F46        | 0.004                                           | 0.004         | 0.000                                            | 0.010         | 0.032                                            | 0.015         | 0.066                                            | 0.019         |

|            |               |               |               |               |               |               |               |               |
|------------|---------------|---------------|---------------|---------------|---------------|---------------|---------------|---------------|
| D47        | -0.003        | -0.008        | -0.058        | -0.011        | -0.050        | -0.016        | -0.107        | -0.024        |
| K48        | -0.024        | -0.006        | -0.059        | -0.003        | -0.114        | -0.008        | -0.168        | -0.009        |
| K49        | 0.019         | 0.004         | 0.030         | 0.009         | 0.066         | 0.015         | 0.100         | 0.022         |
| Y50        | -0.042        | 0.001         | -0.011        | 0.001         | -0.025        | 0.008         | -0.135        | 0.002         |
| N51        | 0.029         | -0.009        | 0.022         | -0.005        | 0.083         | -0.004        | 0.048         | 0.004         |
| <b>T53</b> | <b>0.026</b>  | <b>-0.015</b> | <b>0.005</b>  | <b>-0.015</b> | <b>0.083</b>  | <b>-0.037</b> | <b>0.222</b>  | <b>-0.026</b> |
| <b>W54</b> | <b>0.046</b>  | <b>-0.004</b> | <b>0.068</b>  | <b>-0.005</b> | <b>0.140</b>  | <b>-0.009</b> | <b>0.228</b>  | <b>-0.004</b> |
| H55        | -0.011        | -0.004        | -0.043        | -0.008        | -0.052        | -0.020        | -0.053        | -0.029        |
| C56        | 0.000         | 0.004         | -0.006        | 0.014         | -0.028        | 0.031         | -0.062        | 0.038         |
| <b>I57</b> | <b>-0.051</b> | <b>0.008</b>  | <b>-0.127</b> | <b>0.007</b>  | <b>-0.209</b> | <b>0.012</b>  | <b>-0.279</b> | <b>0.011</b>  |
| V58        | -0.031        | 0.010         | -0.080        | 0.031         | -0.101        | 0.057         | -0.136        | 0.078         |
| G59        | -0.016        | 0.009         | -0.060        | 0.018         | -0.078        | 0.026         | -0.127        | 0.038         |
| R60        | 0.001         | 0.003         | -0.057        | 0.009         | -0.045        | 0.015         | -0.070        | 0.020         |
| N61        | 0.016         | 0.015         | -0.003        | 0.024         | 0.008         | 0.039         | 0.029         | 0.054         |
| F62        | 0.051         | 0.007         | 0.063         | 0.019         | 0.111         | 0.032         | 0.145         | 0.040         |
| G63        | 0.050         | 0.017         | 0.060         | 0.027         | 0.066         | 0.050         | 0.114         | 0.066         |
| <b>S64</b> | <b>0.071</b>  | <b>0.009</b>  | <b>0.099</b>  | <b>0.000</b>  | <b>ND</b>     | <b>ND</b>     | <b>ND</b>     | <b>ND</b>     |
| Y65        | -0.180        | -0.040        | 0.302         | 0.040         | -0.187        | -0.033        | -0.190        | -0.031        |
| V66        | 0.094         | -0.025        | 0.061         | 0.010         | 0.111         | -0.018        | -0.008        | -0.016        |
| <b>T67</b> | <b>0.003</b>  | <b>-0.013</b> | <b>-0.038</b> | <b>-0.007</b> | <b>ND</b>     | <b>ND</b>     | <b>ND</b>     | <b>ND</b>     |
| <b>E69</b> | <b>0.093</b>  | <b>0.005</b>  | <b>0.000</b>  | <b>0.003</b>  | <b>ND</b>     | <b>ND</b>     | <b>ND</b>     | <b>ND</b>     |
| <b>T70</b> | <b>0.102</b>  | <b>0.004</b>  | <b>-0.814</b> | <b>0.002</b>  | <b>-0.777</b> | <b>0.011</b>  | <b>-0.751</b> | <b>0.017</b>  |
| <b>R71</b> | <b>0.093</b>  | <b>0.006</b>  | <b>-0.200</b> | <b>-0.018</b> | <b>ND</b>     | <b>ND</b>     | <b>ND</b>     | <b>ND</b>     |
| <b>H72</b> | <b>-0.058</b> | <b>0.015</b>  | <b>-0.075</b> | <b>-0.004</b> | <b>0.082</b>  | <b>-0.017</b> | <b>ND</b>     | <b>ND</b>     |
| F73        | -0.108        | -0.006        | 0.124         | 0.002         | 0.150         | 0.002         | 0.073         | 0.014         |
| I74        | -0.007        | -0.004        | -0.031        | -0.007        | 0.056         | 0.007         | 0.040         | 0.017         |
| Y75        | 0.019         | 0.006         | -0.017        | 0.011         | -0.009        | 0.016         | 0.013         | 0.031         |
| F76        | -0.010        | 0.006         | -0.025        | 0.010         | -0.038        | 0.016         | -0.043        | 0.020         |
| Y77        | -0.037        | 0.006         | -0.076        | 0.006         | -0.120        | 0.012         | -0.146        | 0.018         |
| L78        | -0.012        | 0.010         | -0.023        | 0.011         | -0.019        | 0.017         | -0.022        | 0.019         |
| G79        | 0.001         | 0.004         | -0.029        | 0.008         | -0.033        | 0.013         | -0.029        | 0.018         |
| Q80        | -0.025        | 0.010         | -0.033        | 0.008         | -0.043        | 0.010         | -0.026        | 0.011         |
| V81        | 0.008         | 0.005         | -0.016        | 0.010         | -0.013        | 0.015         | -0.026        | 0.018         |
| A82        | 0.023         | 0.004         | 0.016         | 0.014         | 0.039         | 0.021         | 0.049         | 0.028         |
| I83        | 0.019         | 0.010         | 0.000         | 0.013         | 0.016         | 0.019         | 0.023         | 0.023         |
| L84        | 0.009         | 0.005         | -0.022        | 0.009         | -0.007        | 0.015         | -0.015        | 0.017         |
| L85        | -0.001        | -0.003        | -0.022        | -0.008        | -0.021        | -0.015        | -0.028        | -0.023        |
| F86        | -0.017        | 0.002         | -0.041        | -0.001        | -0.054        | -0.002        | -0.069        | -0.017        |
| K87        | -0.083        | -0.005        | NA            | NA            | NA            | NA            | NA            | NA            |

\*ND- not detectable because of paramagnetically-induced broadening



**Table S2.** Solid-state chemical shift perturbations observed in the NCACB spectra of LC8 samples containing different Cu(II)-EDTA dopant concentrations. Solid-state chemical shifts of the LC8 sample doped with 5 mM Cu(II)-EDTA are shown. The data presented in this table are also plotted as bar charts in Figure S3, where it can be clearly seen that the extent of chemical shift perturbations and the number of peaks whose shifts are perturbed increase as a function of the paramagnetic dopant concentration.

| Residue    | $\Delta\delta$ , 0mM vs. 5mM Cu(II)-EDTA |                                  |                                 | $\Delta\delta$ , 0mM vs. 10mM Cu(II)-EDTA |                                  |                                 | $\Delta\delta$ , 0mM vs. 50mM Cu(II)-EDTA |                                  |                                 | $\delta$ , 5 mM Cu(II)-EDTA |                                  |                                 |
|------------|------------------------------------------|----------------------------------|---------------------------------|-------------------------------------------|----------------------------------|---------------------------------|-------------------------------------------|----------------------------------|---------------------------------|-----------------------------|----------------------------------|---------------------------------|
|            | N                                        | C <sup><math>\alpha</math></sup> | C <sup><math>\beta</math></sup> | N                                         | C <sup><math>\alpha</math></sup> | C <sup><math>\beta</math></sup> | N                                         | C <sup><math>\alpha</math></sup> | C <sup><math>\beta</math></sup> | N                           | C <sup><math>\alpha</math></sup> | C <sup><math>\beta</math></sup> |
| M1         |                                          |                                  |                                 |                                           |                                  |                                 |                                           |                                  |                                 |                             |                                  |                                 |
| S2         |                                          |                                  |                                 |                                           |                                  |                                 |                                           |                                  |                                 |                             |                                  |                                 |
| D3         |                                          |                                  |                                 |                                           |                                  |                                 |                                           |                                  |                                 |                             |                                  |                                 |
| R4         |                                          |                                  |                                 |                                           |                                  |                                 |                                           |                                  |                                 |                             |                                  |                                 |
| K5         |                                          |                                  |                                 |                                           |                                  |                                 |                                           |                                  |                                 |                             |                                  |                                 |
| A6         |                                          |                                  |                                 |                                           |                                  |                                 |                                           |                                  |                                 |                             |                                  |                                 |
| V7         | -0.057                                   | 0.007                            | -0.052                          | -0.219                                    | -0.010                           | -0.067                          | -0.208                                    | 0.015                            | -0.178                          | 123.271                     | 61.85                            | 34.004                          |
| I8         | -0.084                                   | -0.014                           | -0.037                          | -0.256                                    | 0.080                            | 0.224                           | -0.134                                    | -0.372                           | -0.184                          | 128.893                     | 61.222                           | 36.212                          |
| K9         | 0.063                                    | 0.054                            | 0.002                           | -0.059                                    | 0.152                            | -0.009                          | 0.337                                     | 0.194                            | 0.110                           | 129.427                     | 56.173                           | 32.418                          |
| <b>N10</b> | -0.050                                   | 0.096                            | 0.011                           | -0.215                                    | 0.146                            | 0.522                           | NA                                        | NA                               | NA                              | 114.8385                    | 53.9195                          | 42.858                          |
| <b>A11</b> | 0.356                                    | -0.046                           | 0.011                           | 0.335                                     | -0.026                           | -0.018                          | 0.663                                     | -0.151                           | -0.073                          | 124.104                     | 51.937                           | 22.471                          |
| <b>D12</b> | 0.059                                    | -0.079                           | -0.039                          | 0.086                                     | -0.120                           | 0.116                           | NA                                        | NA                               | NA                              | 122.293                     | 53.139                           | 41.226                          |
| <b>M13</b> | -0.234                                   | 0.140                            | 0.159                           | -0.804                                    | 0.104                            | 0.205                           | NA                                        | NA                               | NA                              | 120.928                     | 56.549                           | 39.107                          |
| <b>S14</b> | -0.585                                   | -0.101                           | 0.039                           | -1.262                                    | -0.199                           | -0.209                          | NA                                        | NA                               | NA                              | 124.361                     | 58.382                           | 64.169                          |
| E15        | -0.020                                   | 0.044                            | 0.020                           | 0.152                                     | 0.165                            | -0.010                          | -0.084                                    | 0.134                            | -0.204                          | 122.954                     | 60.442                           | 29.204                          |
| E16        |                                          |                                  |                                 |                                           |                                  |                                 |                                           |                                  |                                 |                             |                                  |                                 |
| <b>M17</b> | -0.229                                   | -0.084                           | 0.132                           | -0.297                                    | -0.026                           | 0.027                           | -0.544                                    | 0.275                            | -0.374                          | 120.895                     | 59.661                           | 33.042                          |
| <b>Q18</b> | 0.009                                    | -0.059                           | 0.028                           | 0.304                                     | 0.026                            | -0.012                          | 1.247                                     | -0.729                           | 0.233                           | 118.728                     | 59.616                           | 29.079                          |
| Q19        | 0.069                                    | 0.031                            | -0.005                          | 0.130                                     | 0.135                            | 0.012                           | -0.220                                    | 0.026                            | 0.032                           | 116.683                     | 57.896                           | 28.004                          |
| D20        |                                          |                                  |                                 |                                           |                                  |                                 |                                           |                                  |                                 |                             |                                  |                                 |
| A21        | 0.020                                    | -0.078                           | 0.005                           | -0.293                                    | 0.022                            | -0.139                          | -0.189                                    | 0.047                            | -0.054                          | 124.96                      | 55.9325                          | 17.62                           |
| V22        | -0.083                                   | 0.011                            | 0.002                           | -0.290                                    | -0.072                           | -0.052                          | -0.426                                    | -0.030                           | -0.045                          | 118.88                      | 66.831                           | 31.814                          |
| D23        | -0.171                                   | -0.003                           | 0.036                           | -0.012                                    | 0.013                            | 0.045                           | -0.055                                    | -0.029                           | 0.097                           | 123.833                     | 57.803                           | 40.193                          |
| C24        | -0.104                                   | -0.010                           | -0.040                          | -0.214                                    | 0.033                            | -0.084                          | -0.334                                    | 0.132                            | -0.058                          | 121.163                     | 62.927                           | 27.61                           |

|            |        |        |        |        |        |        |        |        |        |          |        |        |
|------------|--------|--------|--------|--------|--------|--------|--------|--------|--------|----------|--------|--------|
| A25        | -0.045 | 0.011  | -0.009 | 0.147  | 0.064  | -0.092 | 0.296  | 0.151  | -0.100 | 120.238  | 55.017 | 19.963 |
| T26        | -0.142 | -0.014 | -0.038 | -0.075 | 0.032  | -0.042 | -0.028 | 0.008  | 0.007  | 115.274  | 67.804 | 68.729 |
| Q27        | 0.020  | -0.031 | 0.017  | -0.030 | -0.018 | -0.028 | -0.168 | -0.074 | -0.120 | 120.278  | 58.625 | 28.529 |
| A28        | -0.112 | 0.007  | -0.043 | -0.117 | 0.006  | -0.084 | -0.006 | 0.099  | -0.129 | 122.473  | 55.178 | 20.961 |
| L29        | -0.007 | 0.018  | 0.025  | -0.081 | 0.089  | -0.062 | 0.197  | 0.259  | 0.125  | 116.659  | 56.991 | 42.069 |
| E30        | 0.045  | 0.001  | -0.005 | -0.002 | 0.009  | -0.133 | -0.337 | 0.061  | -0.031 | 117.252  | 58.39  | 29.614 |
| K31        | -0.086 | 0.020  | 0.018  | 0.092  | -0.091 | 0.030  | 0.143  | -0.027 | -0.019 | 117.622  | 58.174 | 35.498 |
| Y32        |        |        |        |        |        |        |        |        |        |          |        |        |
| N33        | 0.016  | 0.062  | 0.064  | 0.465  | 0.075  | 0.019  | -0.400 | -0.064 | -0.212 | 110.208  | 53.32  | 41.852 |
| <b>I34</b> | -0.089 | 0.137  | 0.027  | 0.455  | -0.004 | 0.401  | NA     | NA     | NA     | 122.009  | 60.665 | 39.375 |
| <b>E35</b> | -0.304 | -0.058 | 0.034  | NA     | NA     | NA     | NA     | NA     | NA     | 129.729  | 62.523 | 28.319 |
| <b>K36</b> | 0.309  | 0.014  | 0.081  | 0.948  | -0.084 | 0.510  | NA     | NA     | NA     | 116.167  | 59.764 | 31.743 |
| D37        |        |        |        |        |        |        |        |        |        |          |        |        |
| I38        | -0.205 | 0.016  | -0.040 | -0.353 | 0.033  | -0.065 | -0.139 | 0.081  | -0.090 | 122.905  | 65.485 | 38.403 |
| A39        | 0.029  | 0.026  | 0.048  | 0.217  | 0.074  | 0.121  | 0.464  | 0.177  | -0.032 | 119.016  | 54.811 | 17.891 |
| A40        | 0.029  | 0.026  | 0.048  | 0.217  | 0.074  | 0.121  | 0.464  | 0.177  | -0.032 | 119.016  | 54.811 | 17.891 |
| Y41        | -0.026 | 0.049  | 0.034  | 0.198  | 0.090  | 0.011  | -0.026 | 0.107  | -0.035 | 117.008  | 61.55  | 38.448 |
| I42        | -0.131 | 0.046  | 0.018  | -0.142 | 0.024  | -0.029 | -0.101 | 0.108  | -0.029 | 117.812  | 64.871 | 38.386 |
| K43        | 0.058  | 0.009  | 0.078  | -0.293 | -0.020 | -0.373 | -0.006 | -0.155 | -0.033 | 118.647  | 61.127 | 35.876 |
| K44        |        |        |        |        |        |        |        |        |        |          |        |        |
| E45        | -0.205 | 0.066  | 0.072  | -0.097 | -0.010 | -0.048 | 0.025  | 0.051  | -0.246 | 119.736  | 58.961 | 29.602 |
| F46        | -0.104 | -0.029 | -0.041 | -0.259 | -0.121 | -0.099 | 0.273  | -0.120 | -0.255 | 122.891  | 63.737 | 35.658 |
| D47        |        |        |        |        |        |        |        |        |        |          |        |        |
| K48        | -0.162 | 0.008  | 0.026  | 0.007  | -0.041 | 0.076  | -0.457 | 0.393  | -0.274 | 117.443  | 59.037 | 32.818 |
| K49        | -0.308 | -0.041 | 0.038  | -0.145 | -0.084 | 0.025  | -0.427 | -0.073 | -0.293 | 117.513  | 58.828 | 34.055 |
| Y50        | 0.010  | -0.041 | -0.055 | 0.221  | 0.242  | 0.097  | 0.149  | 0.326  | 0.320  | 113.566  | 58.182 | 40.283 |
| N51        | -0.266 | -0.010 | 0.005  | -0.129 | -0.142 | 0.146  | 0.425  | -0.053 | 0.015  | 113.628  | 55.372 | 36.381 |
| <b>P52</b> | 0.048  | -0.119 | -0.104 | 0.342  | -0.094 | -0.096 | 0.810  | -0.471 | -0.225 | 128.819  | 60.252 | 32.272 |
| T53        | -0.082 | -0.078 | 0.047  | -0.031 | -0.130 | 0.145  | 0.402  | 0.012  | 0.136  | 122.224  | 64.861 | 69.986 |
| W54        | 0.067  | 0.000  | -0.002 | 0.229  | -0.004 | -0.094 | 0.454  | -0.039 | -0.185 | 128.425  | 55.85  | 30.145 |
| <b>H55</b> | -0.084 | -0.017 | 0.096  | 0.025  | -0.132 | 0.155  | -0.548 | -0.363 | -0.133 | 118.3    | 54.863 | 34.353 |
| C56        | 0.024  | -0.024 | 0.047  | 0.056  | -0.013 | -0.063 | -0.229 | -0.120 | 0.147  | 120.354  | 56.588 | 31.097 |
| I57        | -0.272 | -0.131 | -0.070 | -0.278 | 0.005  | -0.077 | -0.721 | -0.333 | -0.254 | 132.1785 | 59.794 | 39.824 |



**Table S3** Chemical shift differences observed in a pair of 3D NCACB spectra (NUS and US) for LC8 doped with 5 mM Cu(II)-EDTA. The US spectrum was acquired as a 32 x 32 point hypercomplex matrix in indirect dimensions, and in the NUS data 25% (256) hypercomplex points of the US schedule were sampled. The digital resolution is the same for both spectra.

|     | $\Delta\delta$ (C <sup>a</sup> ) | $\Delta\delta$ (N) | $\Delta\delta$ (C <sup>b</sup> ) |
|-----|----------------------------------|--------------------|----------------------------------|
| M1  |                                  |                    |                                  |
| S2  |                                  |                    |                                  |
| D3  |                                  |                    |                                  |
| R4  |                                  |                    |                                  |
| K5  |                                  |                    |                                  |
| A6  |                                  |                    |                                  |
| V7  | 0.160                            | 0.164              | 0.129                            |
| I8  | 0.028                            | 0.053              | -0.006                           |
| K9  | 0.035                            | 0.131              | 0.029                            |
| N10 | 0.077                            | 0.060              | 0.112                            |
| A11 | 0.028                            | 0.127              | 0.064                            |
| D12 | -0.076                           | 0.028              | -0.013                           |
| M13 | 0.063                            | 0.034              | -0.095                           |
| S14 | -0.005                           | -0.262             | 0.061                            |
| E15 | 0.000                            | 0.085              | 0.008                            |
| E16 |                                  |                    |                                  |
| M17 | 0.017                            | 0.031              | 0.070                            |
| Q18 | 0.058                            | -0.129             | -0.021                           |
| Q19 | -0.027                           | 0.030              | 0.075                            |
| D20 |                                  |                    |                                  |
| A21 | -0.033                           | 0.231              | -0.052                           |
| V22 | 0.028                            | 0.016              | 0.032                            |
| D23 | -0.049                           | -0.138             | -0.025                           |
| C24 | 0.036                            | 0.039              | 0.010                            |
| A25 | -0.005                           | 0.015              | 0.012                            |
| T26 | 0.034                            | 0.048              | -0.005                           |
| Q27 | -0.009                           | -0.014             | 0.006                            |
| A28 | 0.030                            | 0.062              | 0.016                            |
| L29 | 0.020                            | -0.030             | 0.017                            |
| E30 | -0.011                           | 0.012              | 0.018                            |
| K31 | -0.141                           | 0.110              | -0.041                           |
| Y32 |                                  |                    |                                  |
| N33 | 0.104                            | -0.055             | 0.057                            |
| I34 | 0.121                            | 0.134              | 0.029                            |
| E35 | -0.012                           | -0.139             | -0.034                           |
| K36 | 0.016                            | 0.158              | 0.100                            |
| D37 |                                  |                    |                                  |
| I38 | 0.037                            | -0.068             | -0.018                           |
| A39 | 0.037                            | 0.051              | 0.048                            |
| A40 | 0.037                            | 0.051              | 0.048                            |
| Y41 | 0.004                            | -0.014             | 0.025                            |
| I42 | 0.051                            | 0.013              | 0.025                            |

|     |        |        |        |
|-----|--------|--------|--------|
| K43 | 0.008  | 0.093  | 0.026  |
| K44 |        |        |        |
| E45 | 0.058  | -0.009 | 0.101  |
| F46 | -0.051 | -0.016 | -0.029 |
| D47 |        |        |        |
| K48 | 0.143  | 0.021  | -0.074 |
| K49 | 0.043  | 0.101  | 0.102  |
| Y50 | -0.041 | 0.064  | 0.242  |
| N51 | 0.015  | 0.051  | -0.052 |
| P52 | 0.003  | 0.092  | -0.061 |
| T53 | 0.110  | 0.022  | -0.011 |
| W54 | 0.007  | 0.070  | -0.017 |
| H55 | 0.026  | -0.011 | 0.096  |
| C56 | 0.016  | 0.025  | 0.047  |
| I57 | 0.014  | -0.006 | 0.014  |
| V58 | 0.001  | 0.056  | 0.063  |
| G59 | 0.006  | -0.002 | -0.021 |
| R60 |        |        |        |
| N61 |        |        |        |
| F62 | 0.010  | 0.092  | -0.005 |
| G63 | 0.016  | 0.055  | 0.040  |
| S64 | 0.085  | 0.015  | -0.005 |
| Y65 |        |        |        |
| V66 | 0.073  | 0.067  | -0.031 |
| T67 | 0.111  | -0.149 | 0.137  |
| H68 |        |        |        |
| E69 |        |        |        |
| T70 | 0.046  | -0.176 | 0.028  |
| R71 |        |        |        |
| H72 |        |        |        |
| F73 | -0.127 | 0.035  | 0.113  |
| I74 | 0.049  | -0.003 | 0.063  |
| Y75 | 0.049  | 0.108  | 0.002  |
| F76 | -0.078 | 0.022  | 0.125  |
| Y77 | 0.143  | -0.025 | 0.167  |
| L78 |        |        |        |
| G79 | 0.047  | 0.067  | 0.008  |
| Q80 | -0.071 | 0.013  | -0.095 |
| V81 | -0.018 | 0.077  | 0.071  |
| A82 | -0.040 | -0.087 | 0.005  |
| I83 | 0.007  | 0.011  | 0.061  |
| L84 | 0.106  | 0.121  | 0.104  |
| L85 | 0.057  | -0.071 | 0.091  |
| F86 | -0.040 | 0.017  | 0.021  |
| K87 |        |        |        |
| S88 |        |        |        |
| G89 |        |        |        |

---

---

**Table S4.** The Chemical Shifts Assignments of LC8 on the Basis of NUS-PACC Experiments Conducted on the Sample Doped with 5 mM Cu(II)-EDTA.\*

| Residue | N     | C <sup>α</sup> | C <sup>β</sup> | C <sup>γ</sup> |
|---------|-------|----------------|----------------|----------------|
| M1      |       |                |                |                |
| S2      |       |                |                |                |
| D3      |       |                |                |                |
| R4      |       |                |                |                |
| K5      |       |                |                |                |
| A6      |       | 51.4           |                | 177.3          |
| V7      | 123.1 | 61.7           | 34.0           | 175.3          |
| I8      | 128.8 | 61.3           | 36.2           | 176.1          |
| K9      | 129.3 | 56.1           | 32.4           | 176.8          |
| N10     | 114.8 | 53.9           | 42.9           | 172.1          |
| A11     | 124.0 | 52.0           | 22.5           | 175.2          |
| D12     | 122.4 | 53.2           | 41.2           | 173.6          |
| M13     | 120.9 | 56.2           | 39.1           | 175.0          |
| S14     | 123.9 | 58.4           | 64.2           | 174.6          |
| E15     | 123.0 | 60.5           | 29.2           | 179.1          |
| E16     |       |                |                |                |
| M17     | 120.8 | 59.7           | 33.0           | 177.7          |
| Q18     | 118.7 | 59.5           | 29.1           | 177.8          |
| Q19     | 116.7 | 57.9           | 28.0           |                |
| D20     |       |                |                |                |
| A21     | 125.0 | 56.0           | 17.6           | 178.6          |
| V22     | 118.9 | 66.8           | 31.8           | 179.8          |
| D23     | 123.8 | 57.8           | 40.2           | 178.5          |
| C24     | 121.1 | 62.9           | 27.6           | 176.7          |
| A25     | 120.2 | 55.0           | 20.0           | 178.1          |
| T26     | 115.3 | 67.8           | 68.7           | 176.8          |
| Q27     | 120.2 | 58.7           | 28.5           | 178.7          |
| A28     | 122.6 | 55.1           | 21.0           | 178.5          |
| L29     | 116.8 | 57.0           | 42.1           | 179.2          |
| E30     | 117.2 | 58.4           | 29.6           | 178.1          |
| K31     | 117.5 | 58.2           | 35.5           |                |
| Y32     |       | 56.5           |                | 173.5          |
| N33     | 110.3 | 53.3           | 41.9           | 176.0          |
| I34     | 122.0 | 61.0           | 39.4           | 177.9          |
| E35     | 129.7 | 62.4           | 28.3           | 178.2          |
| K36     | 116.1 | 59.8           | 31.7           | 177.2          |
| D37     |       | 56.4           |                | 178.5          |
| I38     | 123.0 | 65.5           | 38.4           | 176.7          |
| A39     | 119.0 | 54.8           | 17.9           | 178.5          |
| A40     | 119.1 | 54.9           | 17.9           | 178.4          |
| Y41     | 117.0 | 61.6           | 38.4           | 177.6          |
| I42     | 117.8 | 64.9           | 38.4           | 177.1          |
| K43     | 118.6 | 61.0           | 35.9           | 178.7          |
| K44     | 116.9 | 60.0           |                | 180.4          |
| E45     | 119.8 | 58.8           | 29.6           | 178.7          |

|     |       |      |      |       |
|-----|-------|------|------|-------|
| F46 | 123.0 | 63.7 | 35.7 | 177.8 |
| D47 |       |      |      |       |
| K48 | 117.4 | 58.9 | 32.8 | 178.0 |
| K49 | 117.6 | 58.9 | 34.1 | 177.8 |
| Y50 | 113.8 | 58.2 | 40.3 | 176.8 |
| N51 | 113.7 | 55.4 | 36.4 | 172.4 |
| P52 | 128.4 | 60.0 | 32.3 | 178.4 |
| T53 | 122.3 | 64.8 | 70.0 | 172.1 |
| W54 | 128.3 | 55.9 | 30.1 | 174.0 |
| H55 | 118.3 | 54.9 | 34.4 | 174.7 |
| C56 | 120.4 | 56.6 | 31.1 | 171.2 |
| I57 | 132.2 | 59.8 | 39.8 | 173.5 |
| V58 | 124.4 | 59.4 | 36.7 | 175.5 |
| G59 | 112.3 | 46.8 |      | 172.6 |
| R60 |       |      |      |       |
| N61 |       |      |      |       |
| F62 | 119.1 | 57.5 | 40.2 | 173.4 |
| G63 | 107.8 | 43.6 |      | 171.6 |
| S64 | 111.2 | 57.2 | 68.5 | 171.9 |
| Y65 | 122.1 | 61.4 |      | 173.2 |
| V66 | 119.9 | 57.1 | 33.3 | 175.0 |
| T67 | 122.4 | 61.6 | 70.1 | 175.0 |
| H68 |       |      |      |       |
| E69 |       |      |      |       |
| T70 | 125.9 | 64.0 | 68.9 |       |
| R71 |       |      |      |       |
| H72 |       |      |      |       |
| F73 | 120.4 | 58.2 | 43.3 | 172.4 |
| I74 | 128.6 | 61.8 | 40.6 | 169.0 |
| Y75 | 126.9 | 54.5 | 40.9 | 174.4 |
| F76 | 125.0 | 54.8 | 43.1 | 169.8 |
| Y77 | 118.0 | 55.7 | 41.9 | 176.4 |
| L78 |       |      |      |       |
| G79 | 114.5 | 46.8 |      | 175.3 |
| Q80 | 125.1 | 56.1 | 29.5 | 174.8 |
| V81 | 119.4 | 62.6 | 33.2 | 172.1 |
| A82 | 128.7 | 50.3 | 20.7 | 176.0 |
| I83 | 119.7 | 60.6 | 39.8 | 173.2 |
| L84 | 127.7 | 53.1 | 46.4 | 173.8 |
| L85 | 130.0 | 53.9 | 46.6 | 174.1 |
| F86 | 120.9 | 56.3 | 42.2 | 172.9 |
| K87 | 116.4 | 54.9 | 34.4 |       |
| S88 |       |      |      |       |
| G89 |       |      |      |       |

---

\*The chemical shifts for N C<sup>α</sup>, and C' are the average values of chemical shifts extracted from 3D NUS-PACC NCACB, NCACO and NCOCA spectra.

**Table S5.** The standard deviations for the resolved residues in 3D NUS-PACC NCOCA spectra acquired three times. The three NCOCA spectra were collected back to back with the same settings and the sampling schedules shown in Figure 2 (B). Spectra were processed by MINT; 90 degree sinebell apodization was used for the direct dimension.

|     | C' (ppm) | N (ppm) | CA (ppm) |
|-----|----------|---------|----------|
| M1  |          |         |          |
| S2  |          |         |          |
| D3  |          |         |          |
| R4  |          |         |          |
| K5  |          |         |          |
| A6  | 0.11     |         | 0.09     |
| V7  | 0.03     | 0.04    | 0.02     |
| I8  | 0.02     | 0.05    | 0.02     |
| K9  | 0.05     | 0.07    | 0.02     |
| N10 | 0.05     | 0.07    | 0.03     |
| A11 | 0.03     | 0.08    | 0.03     |
| D12 |          | 0.19    |          |
| M13 | 0.01     |         | 0.01     |
| S14 | 0.04     | 0.01    | 0.02     |
| E15 |          | 0.03    |          |
| E16 |          |         |          |
| M17 | 0.04     |         | 0.04     |
| Q18 | 0.02     | 0.01    | 0.06     |
| Q19 |          | 0.04    |          |
| D20 |          |         |          |
| A21 | 0.03     |         | 0.03     |
| V22 | 0.06     | 0.02    | 0.01     |
| D23 | 0.01     | 0.07    | 0.03     |
| C24 | 0.03     | 0.01    | 0.02     |
| A25 | 0.05     | 0.02    | 0.01     |
| T26 | 0.02     | 0.06    | 0.02     |
| Q27 | 0.03     | 0.04    | 0.04     |
| A28 | 0.04     | 0.05    | 0.03     |
| L29 | 0.08     | 0.04    | 0.02     |
| E30 | 0.06     | 0.01    | 0.05     |
| K31 |          | 0.02    |          |
| Y32 | 0.06     |         | 0.04     |
| N33 |          | 0.08    |          |
| I34 | 0.04     |         | 0.10     |
| E35 | 0.10     | 0.02    | 0.04     |
| K36 |          | 0.04    |          |
| D37 | 0.02     |         | 0.01     |
| I38 | 0.03     | 0.06    | 0.02     |
| A39 | 0.05     | 0.05    | 0.01     |
| A40 | 0.04     | 0.04    | 0.03     |
| Y41 | 0.04     | 0.04    | 0.01     |
| I42 | 0.02     | 0.04    | 0.03     |
| K43 |          | 0.05    |          |



|     |      |      |      |
|-----|------|------|------|
| K44 | 0.04 |      | 0.07 |
| E45 | 0.03 | 0.06 | 0.04 |
| F46 |      | 0.05 |      |
| D47 |      |      |      |
| K48 |      |      |      |
| K49 | 0.01 |      | 0.03 |
| Y50 | 0.07 | 0.04 | 0.04 |
| N51 | 0.07 | 0.08 | 0.07 |
| P52 | 0.00 | 0.03 | 0.02 |
| T53 | 0.02 | 0.06 | 0.04 |
| W54 | 0.02 | 0.03 | 0.03 |
| H55 | 0.01 | 0.05 | 0.01 |
| C56 | 0.05 | 0.01 | 0.01 |
| I57 | 0.03 | 0.01 | 0.02 |
| V58 | 0.04 | 0.04 | 0.03 |
| G59 |      | 0.01 |      |
| R60 |      |      |      |
| N61 |      |      |      |
| F62 | 0.04 |      | 0.07 |
| G63 | 0.06 | 0.05 | 0.06 |
| S64 | 0.03 | 0.16 | 0.02 |
| Y65 | 0.04 | 0.11 | 0.22 |
| V66 | 0.05 | 0.07 | 0.04 |
| T67 |      | 0.14 |      |
| H68 |      |      |      |
| E69 |      |      |      |
| T70 |      |      |      |
| R71 |      |      |      |
| H72 |      |      |      |
| F73 | 0.06 |      | 0.03 |
| I74 | 0.02 | 0.08 | 0.03 |
| Y75 | 0.01 | 0.04 | 0.03 |
| F76 | 0.01 | 0.05 | 0.02 |
| Y77 |      | 0.05 |      |
| L78 |      |      |      |
| G79 | 0.11 |      | 0.03 |
| Q80 | 0.05 | 0.04 | 0.03 |
| V81 | 0.00 | 0.06 | 0.06 |
| A82 | 0.04 | 0.05 | 0.02 |
| I83 | 0.04 | 0.02 | 0.03 |
| L84 | 0.03 | 0.01 | 0.05 |
| L85 | 0.02 | 0.07 | 0.01 |
| F86 |      | 0.01 |      |
| K87 |      |      |      |
| S88 |      |      |      |
| G89 |      |      |      |

---

**Table S6.** The NUS Schedules for the Three 3D Experiments

|    | NCOCA |       | NCACB |       | NCACO |       |
|----|-------|-------|-------|-------|-------|-------|
|    | $t_1$ | $t_2$ | $t_1$ | $t_2$ | $t_1$ | $t_2$ |
| 1  | 1     | 1     | 1     | 1     | 1     | 1     |
| 2  | 2     | 1     | 2     | 3     | 1     | 2     |
| 3  | 2     | 4     | 6     | 1     | 1     | 7     |
| 4  | 3     | 3     | 2     | 1     | 3     | 2     |
| 5  | 4     | 2     | 2     | 7     | 2     | 6     |
| 6  | 9     | 1     | 1     | 3     | 1     | 9     |
| 7  | 7     | 1     | 3     | 5     | 4     | 1     |
| 8  | 2     | 5     | 10    | 4     | 1     | 8     |
| 9  | 1     | 8     | 5     | 6     | 7     | 4     |
| 10 | 6     | 7     | 10    | 1     | 1     | 4     |
| 11 | 9     | 4     | 4     | 5     | 5     | 10    |
| 12 | 9     | 2     | 6     | 3     | 8     | 6     |
| 13 | 5     | 6     | 5     | 1     | 7     | 1     |
| 14 | 1     | 6     | 3     | 11    | 7     | 9     |
| 15 | 7     | 4     | 8     | 1     | 11    | 5     |
| 16 | 10    | 6     | 11    | 7     | 6     | 5     |
| 17 | 5     | 8     | 11    | 4     | 3     | 8     |
| 18 | 4     | 4     | 15    | 3     | 8     | 1     |
| 19 | 1     | 10    | 1     | 15    | 12    | 3     |
| 20 | 14    | 2     | 7     | 5     | 15    | 2     |
| 21 | 1     | 3     | 6     | 10    | 9     | 4     |
| 22 | 1     | 11    | 9     | 8     | 7     | 5     |
| 23 | 2     | 15    | 4     | 8     | 5     | 3     |
| 24 | 2     | 9     | 12    | 8     | 13    | 5     |
| 25 | 1     | 13    | 1     | 11    | 14    | 2     |
| 26 | 7     | 5     | 10    | 7     | 9     | 7     |
| 27 | 11    | 1     | 13    | 7     | 12    | 7     |
| 28 | 8     | 1     | 1     | 9     | 6     | 9     |
| 29 | 3     | 12    | 10    | 3     | 7     | 14    |
| 30 | 3     | 7     | 13    | 3     | 7     | 12    |
| 31 | 8     | 6     | 3     | 9     | 1     | 19    |
| 32 | 7     | 6     | 12    | 4     | 4     | 5     |
| 33 | 12    | 4     | 7     | 6     | 2     | 3     |
| 34 | 2     | 7     | 5     | 12    | 6     | 13    |
| 35 | 1     | 9     | 12    | 7     | 8     | 9     |
| 36 | 4     | 6     | 7     | 12    | 16    | 3     |
| 37 | 4     | 12    | 2     | 17    | 3     | 11    |
| 38 | 8     | 7     | 12    | 10    | 2     | 9     |
| 39 | 9     | 3     | 1     | 12    | 5     | 4     |
| 40 | 14    | 6     | 16    | 1     | 12    | 1     |
| 41 | 2     | 17    | 15    | 6     | 7     | 3     |
| 42 | 7     | 10    | 3     | 18    | 3     | 20    |
| 43 | 6     | 9     | 12    | 1     | 6     | 7     |
| 44 | 3     | 14    | 9     | 3     | 10    | 13    |
| 45 | 4     | 8     | 4     | 4     | 11    | 4     |

|    |    |    |    |    |    |    |
|----|----|----|----|----|----|----|
| 46 | 4  | 1  | 14 | 6  | 14 | 3  |
| 47 | 2  | 14 | 5  | 13 | 6  | 18 |
| 48 | 11 | 5  | 4  | 13 | 10 | 14 |
| 49 | 13 | 6  | 18 | 3  | 3  | 23 |
| 50 | 16 | 6  | 18 | 8  | 8  | 8  |
| 51 | 3  | 8  | 7  | 14 | 8  | 7  |
| 52 | 21 | 1  | 19 | 7  | 4  | 2  |
| 53 | 5  | 9  | 20 | 4  | 8  | 15 |
| 54 | 14 | 7  | 12 | 11 | 12 | 12 |
| 55 | 22 | 1  | 2  | 4  | 13 | 8  |
| 56 | 14 | 4  | 4  | 2  | 3  | 10 |
| 57 | 8  | 2  | 2  | 18 | 19 | 3  |
| 58 | 6  | 16 | 25 | 3  | 20 | 3  |
| 59 | 12 | 2  | 2  | 12 | 5  | 8  |
| 60 | 12 | 3  | 5  | 4  | 12 | 9  |
| 61 | 16 | 5  | 21 | 3  | 8  | 12 |
| 62 | 7  | 9  | 3  | 20 | 5  | 6  |
| 63 | 18 | 1  | 2  | 16 | 8  | 16 |
| 64 | 7  | 14 | 24 | 1  | 11 | 6  |
| 65 | 22 | 3  | 24 | 2  | 13 | 11 |
| 66 | 4  | 17 | 10 | 17 | 21 | 2  |
| 67 | 10 | 4  | 10 | 5  | 8  | 5  |
| 68 | 3  | 11 | 3  | 17 | 17 | 4  |
| 69 | 9  | 11 | 8  | 2  | 5  | 5  |
| 70 | 3  | 6  | 12 | 16 | 4  | 22 |
| 71 | 20 | 5  | 13 | 1  | 8  | 3  |
| 72 | 4  | 21 | 25 | 4  | 12 | 4  |
| 73 | 2  | 16 | 17 | 11 | 14 | 4  |
| 74 | 13 | 8  | 17 | 3  | 5  | 1  |
| 75 | 20 | 7  | 7  | 3  | 1  | 12 |
| 76 | 5  | 19 | 25 | 2  | 19 | 1  |
| 77 | 20 | 8  | 10 | 10 | 10 | 10 |
| 78 | 9  | 12 | 8  | 5  | 2  | 1  |
| 79 | 12 | 14 | 11 | 8  | 21 | 3  |
| 80 | 13 | 9  | 5  | 17 | 12 | 5  |
| 81 | 6  | 18 | 3  | 25 | 4  | 24 |
| 82 | 15 | 6  | 6  | 5  | 21 | 4  |
| 83 | 13 | 2  | 14 | 16 | 10 | 18 |
| 84 | 5  | 21 | 15 | 14 | 18 | 3  |
| 85 | 6  | 13 | 3  | 7  | 11 | 11 |
| 86 | 20 | 2  | 4  | 20 | 2  | 8  |
| 87 | 19 | 5  | 9  | 9  | 7  | 2  |
| 88 | 4  | 3  | 14 | 4  | 4  | 14 |
| 89 | 8  | 10 | 2  | 13 | 5  | 24 |
| 90 | 29 | 1  | 2  | 23 | 10 | 9  |
| 91 | 15 | 4  | 29 | 2  | 9  | 11 |
| 92 | 4  | 11 | 16 | 11 | 8  | 17 |
| 93 | 14 | 9  | 7  | 7  | 11 | 17 |
| 94 | 10 | 13 | 6  | 9  | 2  | 18 |

|     |    |    |    |    |    |    |
|-----|----|----|----|----|----|----|
| 95  | 6  | 12 | 22 | 7  | 16 | 12 |
| 96  | 9  | 9  | 1  | 21 | 2  | 23 |
| 97  | 19 | 4  | 6  | 21 | 1  | 22 |
| 98  | 17 | 9  | 14 | 3  | 8  | 13 |
| 99  | 5  | 12 | 17 | 12 | 15 | 14 |
| 100 | 15 | 8  | 1  | 25 | 17 | 2  |
| 101 | 14 | 8  | 20 | 1  | 4  | 10 |
| 102 | 7  | 17 | 11 | 5  | 7  | 7  |
| 103 | 21 | 9  | 1  | 14 | 24 | 4  |
| 104 | 1  | 5  | 9  | 17 | 14 | 10 |
| 105 | 13 | 5  | 6  | 13 | 3  | 18 |
| 106 | 3  | 1  | 15 | 12 | 7  | 21 |
| 107 | 3  | 10 | 18 | 15 | 1  | 6  |
| 108 | 24 | 5  | 5  | 19 | 5  | 20 |
| 109 | 17 | 4  | 14 | 1  | 3  | 16 |
| 110 | 3  | 17 | 21 | 12 | 21 | 5  |
| 111 | 1  | 4  | 10 | 14 | 4  | 20 |
| 112 | 14 | 15 | 15 | 11 | 23 | 3  |
| 113 | 7  | 16 | 20 | 10 | 10 | 1  |
| 114 | 18 | 7  | 1  | 19 | 15 | 13 |
| 115 | 1  | 12 | 9  | 7  | 16 | 4  |
| 116 | 10 | 1  | 19 | 15 | 14 | 16 |
| 117 | 12 | 17 | 19 | 11 | 20 | 1  |
| 118 | 15 | 1  | 32 | 1  | 5  | 21 |
| 119 | 4  | 20 | 23 | 4  | 17 | 14 |
| 120 | 7  | 13 | 6  | 26 | 14 | 1  |
| 121 | 31 | 1  | 12 | 6  | 18 | 1  |
| 122 | 25 | 5  | 19 | 8  | 19 | 10 |
| 123 | 27 | 3  | 4  | 15 | 21 | 6  |
| 124 | 4  | 18 | 15 | 5  | 9  | 1  |
| 125 | 17 | 3  | 24 | 10 | 2  | 4  |
| 126 | 4  | 9  | 17 | 5  | 5  | 17 |
| 127 | 22 | 4  | 15 | 8  | 6  | 11 |
| 128 | 23 | 4  | 15 | 18 | 12 | 11 |
| 129 | 3  | 27 | 1  | 31 | 24 | 5  |
| 130 | 5  | 17 | 2  | 9  | 18 | 12 |
| 131 | 6  | 1  | 12 | 15 | 11 | 12 |
| 132 | 27 | 6  | 8  | 3  | 9  | 23 |
| 133 | 7  | 21 | 16 | 6  | 16 | 11 |
| 134 | 22 | 7  | 16 | 8  | 13 | 20 |
| 135 | 16 | 10 | 8  | 11 | 19 | 12 |
| 136 | 9  | 6  | 2  | 22 | 7  | 22 |
| 137 | 4  | 26 | 21 | 14 | 10 | 11 |
| 138 | 12 | 9  | 19 | 9  | 14 | 9  |
| 139 | 10 | 9  | 30 | 6  | 8  | 4  |
| 140 | 9  | 7  | 7  | 9  | 20 | 6  |
| 141 | 1  | 14 | 2  | 2  | 25 | 5  |
| 142 | 13 | 4  | 2  | 31 | 18 | 10 |
| 143 | 13 | 11 | 20 | 13 | 3  | 13 |

|     |    |    |    |    |    |    |
|-----|----|----|----|----|----|----|
| 144 | 27 | 7  | 4  | 26 | 10 | 7  |
| 145 | 12 | 7  | 15 | 4  | 3  | 19 |
| 146 | 24 | 1  | 25 | 9  | 10 | 19 |
| 147 | 12 | 15 | 9  | 12 | 13 | 22 |
| 148 | 9  | 20 | 29 | 4  | 6  | 8  |
| 149 | 17 | 12 | 23 | 5  | 12 | 24 |
| 150 | 9  | 14 | 1  | 8  | 1  | 21 |
| 151 | 8  | 24 | 30 | 1  | 18 | 8  |
| 152 | 32 | 2  | 16 | 13 | 6  | 23 |
| 153 | 4  | 28 | 7  | 10 | 26 | 5  |
| 154 | 14 | 18 | 9  | 1  | 16 | 18 |
| 155 | 7  | 25 | 8  | 4  | 22 | 4  |
| 156 | 2  | 18 | 2  | 30 | 16 | 13 |
| 157 | 13 | 13 | 8  | 25 | 5  | 12 |
| 158 | 16 | 9  | 15 | 21 | 15 | 11 |
| 159 | 28 | 6  | 18 | 5  | 24 | 7  |
| 160 | 13 | 14 | 22 | 4  | 19 | 9  |
| 161 | 5  | 5  | 17 | 8  | 14 | 21 |
| 162 | 28 | 5  | 2  | 21 | 1  | 3  |
| 163 | 14 | 13 | 23 | 15 | 9  | 3  |
| 164 | 3  | 21 | 7  | 13 | 13 | 18 |
| 165 | 4  | 25 | 8  | 10 | 26 | 1  |
| 166 | 7  | 18 | 2  | 10 | 8  | 24 |
| 167 | 27 | 5  | 20 | 2  | 7  | 16 |
| 168 | 19 | 10 | 9  | 23 | 17 | 9  |
| 169 | 31 | 2  | 17 | 14 | 6  | 10 |
| 170 | 28 | 1  | 25 | 1  | 9  | 15 |
| 171 | 15 | 5  | 8  | 22 | 5  | 15 |
| 172 | 14 | 1  | 20 | 14 | 30 | 2  |
| 173 | 9  | 18 | 4  | 25 | 10 | 16 |
| 174 | 26 | 6  | 26 | 10 | 13 | 24 |
| 175 | 3  | 16 | 19 | 5  | 6  | 3  |
| 176 | 1  | 20 | 10 | 18 | 28 | 1  |
| 177 | 2  | 23 | 10 | 6  | 12 | 16 |
| 178 | 23 | 6  | 10 | 12 | 17 | 11 |
| 179 | 8  | 18 | 1  | 18 | 8  | 14 |
| 180 | 8  | 14 | 30 | 9  | 11 | 21 |
| 181 | 6  | 5  | 23 | 3  | 18 | 11 |
| 182 | 22 | 9  | 7  | 26 | 9  | 22 |
| 183 | 12 | 22 | 24 | 6  | 12 | 18 |
| 184 | 22 | 12 | 18 | 20 | 2  | 21 |
| 185 | 23 | 1  | 4  | 27 | 13 | 19 |
| 186 | 9  | 23 | 5  | 16 | 4  | 8  |
| 187 | 3  | 29 | 21 | 4  | 3  | 6  |
| 188 | 15 | 15 | 9  | 16 | 13 | 10 |
| 189 | 14 | 11 | 4  | 16 | 31 | 2  |
| 190 | 17 | 10 | 5  | 28 | 10 | 22 |
| 191 | 31 | 4  | 10 | 29 | 23 | 4  |
| 192 | 1  | 30 | 15 | 20 | 32 | 24 |

|     |    |    |    |    |
|-----|----|----|----|----|
| 193 | 20 | 11 | 18 | 2  |
| 194 | 20 | 15 | 14 | 2  |
| 195 | 17 | 14 | 11 | 10 |
| 196 | 16 | 7  | 15 | 16 |
| 197 | 14 | 14 | 6  | 7  |
| 198 | 21 | 10 | 3  | 30 |
| 199 | 1  | 19 | 9  | 30 |
| 200 | 30 | 2  | 14 | 9  |
| 201 | 19 | 2  | 24 | 18 |
| 202 | 4  | 31 | 8  | 6  |
| 203 | 8  | 15 | 30 | 2  |
| 204 | 8  | 4  | 5  | 18 |
| 205 | 3  | 32 | 9  | 4  |
| 206 | 8  | 13 | 14 | 22 |
| 207 | 20 | 4  | 23 | 6  |
| 208 | 8  | 11 | 20 | 6  |
| 209 | 26 | 7  | 27 | 11 |
| 210 | 12 | 19 | 14 | 8  |
| 211 | 5  | 14 | 12 | 24 |
| 212 | 16 | 18 | 3  | 14 |
| 213 | 19 | 9  | 7  | 27 |
| 214 | 17 | 13 | 24 | 11 |
| 215 | 1  | 7  | 19 | 6  |
| 216 | 1  | 29 | 9  | 27 |
| 217 | 13 | 24 | 7  | 2  |
| 218 | 20 | 17 | 27 | 13 |
| 219 | 27 | 9  | 12 | 17 |
| 220 | 10 | 2  | 17 | 9  |
| 221 | 16 | 12 | 4  | 12 |
| 222 | 17 | 8  | 25 | 17 |
| 223 | 6  | 3  | 30 | 7  |
| 224 | 8  | 26 | 16 | 14 |
| 225 | 19 | 16 | 16 | 27 |
| 226 | 17 | 7  | 3  | 24 |
| 227 | 7  | 7  | 7  | 11 |
| 228 | 30 | 6  | 11 | 20 |
| 229 | 4  | 32 | 12 | 29 |
| 230 | 32 | 4  | 17 | 6  |
| 231 | 11 | 7  | 1  | 27 |
| 232 | 2  | 22 | 21 | 15 |
| 233 | 5  | 11 | 24 | 14 |
| 234 | 10 | 25 | 2  | 28 |
| 235 | 27 | 8  | 3  | 32 |
| 236 | 5  | 28 | 1  | 20 |
| 237 | 16 | 4  | 17 | 1  |
| 238 | 21 | 3  | 17 | 13 |
| 239 | 13 | 22 | 5  | 8  |
| 240 | 31 | 7  | 18 | 7  |
| 241 | 20 | 1  | 20 | 16 |

|     |    |    |    |    |
|-----|----|----|----|----|
| 242 | 3  | 9  | 29 | 9  |
| 243 | 11 | 14 | 20 | 12 |
| 244 | 2  | 10 | 14 | 15 |
| 245 | 23 | 3  | 26 | 9  |
| 246 | 4  | 30 | 6  | 8  |
| 247 | 18 | 3  | 23 | 16 |
| 248 | 14 | 24 | 9  | 13 |
| 249 | 2  | 2  | 13 | 4  |
| 250 | 27 | 4  | 5  | 31 |
| 251 | 10 | 15 | 8  | 15 |
| 252 | 18 | 21 | 11 | 19 |
| 253 | 5  | 26 | 29 | 8  |
| 254 | 23 | 12 | 5  | 20 |
| 255 | 15 | 16 | 23 | 18 |
| 256 | 32 | 32 | 32 | 32 |
